# Supplementary material for: Genetic diversity and linkage disequilibrium using SNP (KASP) and AFLP markers in a worldwide durum wheat (Triticum turgidum L. var durum) collection
Source: PLoS One. 2019 Jun 28;14(6):e0218562. doi: 10.1371/journal.pone.0218562 (PMC6741835; doi:10.1371/journal.pone.0218562)
Supplement: S1 Table — (XLSX) [file pone.0218562.s006.xlsx]

## Sheet: S1 table
S1 Table. List of KASP markers used in this study and results
N° SNP	KASP ID	Putative Map Location	Category	Breeders' 35K Axiom® array	Affymetrix code	Sequence	Primer Allele FAM	Primer Allele VIC	Primer Common	Allele FAM	Allele VIC	N° of FAM	N° of VIC	N° of Heter.a	N° of Failed	Type of mutation	Source
1	BS00005036	1AS	Polymorphic	not	AX-94503942	GCGAGATCCAGACTTCCAGACCGGCAGAGGGAGGGAGGGAGGGAGGACAGTCCAGAGCGGCAGCAGTTATAGCCACCGNNNNNNNNNNNNNNNNNNNNNNNNNNNNNNNNNNNNNNNNNNNNNNNNNNNNNNNNNNNNNNNNNNNNNNNNNACCGAGCTCGCTCGCTCTCCACGATATTCTGTAGGAAATGGCTGACGGTGAGGACATCCAGCCCCTTGTTTGCGACAATGGAACCGGAATGGTCAAGGCTGGTTTCGCTGGAGATGATGCACCAAGGGCTGTTTTCCCTAGCATAGTTGGTCGCCCACGGCACACTGGTGTCATGGTAGGGATGGGGCAGAAGGATGCTTATGTTGGTGATGAGGCGCAGTCCAAGAGAGGTATCCTCACACTCAAGT…	ACTGCCAAGAACAGCTCCTCG	GACTGCCAAGAACAGCTCCTCA	TCAGGAAGCTCGTAGCTCTTCTCAA	G	A	167	1	0	0	Transition	http://www.cerealsdb.uk.net/
2	BS00005272	1AS	Polymorphic	yes	AX-94669331	CATACTCCCAAGCTCAGGACAACTATGCCCCCTCGTACCACCAGAACGGGAAGGCCCCTGATTTCCATGCAGAGGAGCCGAGGCCGCTGGCGTACAGCAGCGGTGTTGTGGAAAGGCCGCCGCCTCAGCGTCAATGGGTCCCCCCTCAGCCTCCAGGTGTCGCCATGCCAGAAGCGGCGGCTGCTATTCGTCAACAGAAGTC[C/T]CTTACGAAGCAACCGTCTAGCGACACGTCCGAGGCTGCTGGTGAGGTGCAGGTGAACGGTGCCGCGAGCTCGCCTTCCGTCGCCGCCGCTGAAGTGCCGGTTAATGGGAGTGCCGCAAGTGATGCTGGACGCAGCGAGATCGAAGAGCAGGCGGAAGCTGCTGCTTAGACAGCTGGACCACCCCGACAATCG…	AGACGGTTGCTTCGTAAGG	CGCTAGACGGTTGCTTCGTAAGA	AGCGGCGGCTGCTATTCGTCAA	C	T	4	164	0	0	Transition	http://www.cerealsdb.uk.net/
3	BS00010779	1AL	Polymorphic	not	-	ACGAAACCCTGCGAGAAGCGCTGGGGCTCACGGGCATCGCGCTTTGCTTCTTCGGTCTGCTGTACGGTGGCTTCTGGAGAATACAGATGAGGAAGAGATTCAACCTCCCTGGGAACCCCTTCTGCTGCCGTAACCCCGATGTGACGGATTGCTTCCAGTGGCTGTGCTGCTGCTC[C/G]TGCTCTCTCGCTCAGGAGGTGAGGACCGCTGATTACTATGACATTGCAGAGGAGAGGTCGCACAGAGGGCAAGTAAATGGGGAGAGTCAGCGTGTGATGTCCCCATTGGCTCGTGAAGACGGTCTTCCGCTTTTCAAGTCAACTCCAGCCTCGCCGTACAGGAGTAGCACAGGCACGGCTGGTCAGTCGATTTTCATCATGGAGAGCCCATCAGCTCCA…	GTGGCTGTGCTGCTGCTCC	GTGGCTGTGCTGCTGCTCG	GACCTCTCCTCTGCAATGTCATAGTA	C	G	138	29	1	0	Transversion	http://www.cerealsdb.uk.net/
4	BS00019332	1AL	Polymorphic	not	AX-94476297	CGTCCAACCAAATCAATGTAGAATGGCACAAGAGCAACTAATTTTGTCAT[A/G]TCAGCCATGTTGTTTGCATCTGGCAGCACAAACTTGAATGAGAGGACTTTCTTGTAAGAGCCTGCCAGTTGATCTGAAAAATGAAGTGAGATGAACCACTTCCCCATTTTCTCGAAAGCTTTCTCGCCAAGCACCTGATCCAGCACAGCCTCAGTGATCATATCCCCAGCAACCTCCTTTGATTCGGCCACCACTGCAAGCTCATCTGCAATCCACTTCTTCCCAG	CCAGATGCAAACAACATGGCTGAT	CAGATGCAAACAACATGGCTGAC	CAATGTAGAATGGCACAAGAGCAACTAAT	A	G	166	2	0	0	Transition	http://www.cerealsdb.uk.net/
5	BS00003634	1AL	Polymorphic	yes	AX-94543706	TCTGTTGCAGCCTACCTCCTGAGCACTGGTAAGCTGTATTATGCCCTGGCACTAGTTGGA[C/T]TGACAATTCCCCAGGTGATCTTACAGTTCCAGTACTTCCTGAAGGACCCCGTGAAGTAC	ATGCCCTGGCACTAGTTGGAC	ATTATGCCCTGGCACTAGTTGGAT	GGAACTGTAAGATCACCTGGGGAAT	C	T	167	1	0	0	Transition	http://www.cerealsdb.uk.net/
6	BS00014413	1BS	Polymorphic	yes	AX-94672308	GCATATTGGCCCTCGCGTAGTCATTAGAAGGACTTCATTTCTAATTTTTGCACTGTAGCATCCCTTTGTTTCAACGGGGCGCACCCGATAGAAATTGTCCGTTGGTCAAAATACTTGGCCTAGCACAAAAATCTGTTTTAATTGTTGTCTGTGGGCCACATATGTAAATTTCATAGTNNNNNNNNNNNNNNNNNNNNNNNNNNNNNNNNNNNNNNNTATACATACACAATGCACCACACAATATGCATTTTATTGCTTTTATGTAGTCTTGATTACCAACGTTCAATAGTAGATTTACAATAGATATTCCGGCATGTGACCTAACAAAACACATAGCTTTACTTTGCTTTGTTCGCAGCCCTCTGACCCTCCAATGCTTTGTATACTTTGTCAATCTCA…	AGTTCATGAGAGTGACCAGCTGT	GTTCATGAGAGTGACCAGCTGC	CCGTTAAACCATAGCCTTGGATAAAGTAT	A	G	159	7	2	0	Transition	http://www.cerealsdb.uk.net/
7	BS00020741	1BS	Polymorphic	yes	AX-94657189	CCGCTGCAAACCTTTTTGCATTATCATCTTCAGTCCAAGTTACAACCAAGTGACTCCGCTGAATTGGTGCGAATATAAACAGTAGCTAGAAACGACGAGTTGCTGGTCGTAGGCATTGAAGCAACAAAATGGGAATCGTCGTTACAAGCATACGTTCCGCAATATCACCCCAGGCCAACCGAATTCAAAAGATCATACGCAGGGAAAGAACACCAGCAGGCATACTAGGCCCTAACCTACAACAAAGGAATCCCAGATCAATGCCTACATGAGCTTTTTGCTTGTGTCAAACAAAGCCAACAAAGCAGTGGTGGAAGCCTGCTATGTTATCACGATGCCTGCAATGTCACCGAGTTCACAGTCAAACCCGCATAGTTGTTTTGTCACCCGTTAAGTCTT…	GTTGGGCAGATATGTTGTTATGGAC	GTTGGGCAGATATGTTGTTATGGAG	CAATTAGAAGGAAATTTAGGATCCACCTTA	G	C	1	167	0	0	Transversion	http://www.cerealsdb.uk.net/
8	BS00004546	1BS-9	Polymorphic	not	-	CTTCTACTTCATGGCCACGCCGCACGCGGCCCTCTTCGACTCGTACCCGCACGTCAAGGC[A/T]TGGTGGGAGAGGATCATGGCGAGGCC	GCCATGATCCTCTCCCACCAT	GCCATGATCCTCTCCCACCAA	TCGACTCGTACCCGCACGTCAA	A	T	167	1	0	0	Transversion	http://www.cerealsdb.uk.net/
9	BS00005343	1BS-9	Polymorphic	not	AX-94518002	CGGCCGCCATGGACGTGATGGTCAAGCGCGGCGGCGAGCAGCCCAAGCTCGCGCGCAGCCTTGTCATGCTGCTCGTCAACCTCACCCAGGTCGAGTCCGGCATCTCGGCCCTCCTCCAGGTTGGTGATGAAAAGGTGCAAGGGTTGTATGTTGCAAAGCTTGTGCGCTCATTCTGCAGGTCATCCTGTGACTCTGAAGATGAAGATATATTTGAACACATTGCCTCTATACTTGTGAATATCTCAAAGGTCGAAGCTGGACGGAGAATACTGATGGAACCTAAGAGAGGTCTTCTAAAGCAGATTATAGGACAATTTGATTCAACAAA[C/T]CAACTTAGAAAGAAAGGGGTTGCTGGCACCATCCGTAACTGTTGCTTTGAAGCTGATACCCAGATA…	CAGATTATAGGACAATTTGATTCAACAAAC	GCAGATTATAGGACAATTTGATTCAACAAAT	GCCAGCAACCCCTTTCTTTCTAAGTT	C	T	58	110	0	0	Transition	http://www.cerealsdb.uk.net/
10	BS00003575	1BS-10	Polymorphic	yes	AX-94441767	CCAGAGTCTCACCTCCCAGGAGGAAGGTCATAAGGGAAGACAAATCTGAAAAGCAGAACTACATGAAAAAGGATAGTGGAAT[C/T]GAGGCAAGTCGGCCTGGATATAAGGTTCAGCAGGTAAGGCAGTTGCAACAGCAGCAACGACCAACATCTGCTTCAGCTTCTCAGGTTTCGTCAAGGCAATCTGAAAAAGAAAGTTCATGCGATGATGTGGAGATAGATGCCATTCTTGAGGAAGAGGAGGCCCTCATTGCAGCTCACAGGAAGGAAATCGAGAATACAATGGAGATCGTGCGTGAAGAGATGAACCTTT	ATATCCAGGCCGACTTGCCTCA	CCAGGCCGACTTGCCTCG	GCAGAACTACATGAAAAAGGATAGTGGAA	T	C	15	153	0	0	Transition	http://www.cerealsdb.uk.net/
11	BS00004981	1BS	Monomorphic	yes	AX-94804276	GGCAGACGCATCAAACTTCTCAGCAGCCTCTGCAGCACTATTGCTCTGCAGGGTCTTCTTCAGCTTCTGCGCCGCAAGGAAGAATGGACAGGCTAGATGGCTCTGC[A/G]CGCCTTATGATCGTTTCGGATCTTGACCAGACGATGGTTGATCACTGTGATCCGGAGAACTCGGCCTTGCTCCGTTTCGAGGCGCTCTGGGAGTCTGAGTACTCCCAGGATTCTCTGCTGGTGTTCTCGACTGGAAGAACGCCGGTTAGTTACAAGGCTCTGAGGGAAAGAAAGCCTTTGCTCACACCGGACATCACCATCATGTCTGTGGGCACTGTGATAGCATATGGCCAGGAGATGACTCCTGATGTTGGCTGGGAGGAATTTCTGAATAACAAGTGGGATAGG…	GGATAGGCTAGATGGCTCTGCA	GATAGGCTAGATGGCTCTGCG	GTCTGGTCAAGATCCGAAACGATCAT	A	G	168	0	0	0	Transition	http://www.cerealsdb.uk.net/
12	BS00020527	1BS	Heterozygotes	not	-	AGCAAAATTAACTTTGCATATGATGAGGATCAGAAGGTCTGGATTCCACAAGATAAGAAGGATGAAATGGTCTTGATTCTTGTCCAGAGGCAGAAAGAGTTGCAAGCACATATGAGGGATTGGACAGACTGGGCTATGGAGAAGGTGATGCAGGTCACACGGCGGCTTGCCAAAGAGAAGGAGGAGCTTCAGTCACTCCGGAAAGAGAAGGAAGAGGCGAGCCGACTTCATGATGAAAGGCACTGTCTGGAAGAGAGCACTCGGAAGAAGCTTTTAGAGATGGAGTCTGCTATTTCTAGGGCAAACAATCAACTGGATAAAGCAGATGCTTCTGCTCGTAGGCGTGAGGCTGAGAATGCACAACTTAGGATGCAGATGGAAGCCGCAAAGCGGCACGCA…	CAGACCACCTGGTGGGCG	GCAGACCACCTGGTGGGCA	GCGAGGAGATGTCGGTGGTGTT	C	T	1	10	157	0	Transition	http://www.cerealsdb.uk.net/
13	BS00086854	1BS	Failed	not	AX-94628292	TGGCGCTCATGGAGTACGGGCTGGTCACGGTGCGCCCCTCACTGGTGGCGGCGTTTGCCGTGTACGCCGCTCGGTGCACGCTGAAAAGAAGCCCCATCTGGACGGAAACCCTCAAGCACCACACCGGATTCGCTGAACCCCAGCTCCTGGAGCCTGCCAAGGTGCTCGTCATGGCGCACGCGGCTGCTCCGGAGTGCAAGCTCAAGGCCATCTACAAGAAGTACTCCTCTGAGCAGTATGGGCGCGTGTCTCTGCGCCCTCCGGCAGTCGCAGCTCCTCAACGTCTGGCCTAGTTTGCTTTAGGATTTGCTGTGCTCGGCTTTCGATCTTGAAAGCTTGGTTTACTTACTGTTACTGTGTGTTCTGCTACTATCTGATCTGATACACCAGGGTGTAAAC…	ATTCGAAAGCCAAGCAAATCGCTG	CGAAAGCCAAGCAAATCGCTA	GATACACCAGGGTGTAAACAACAACTATA	C	T	0	0	0	168	Transition	http://www.cerealsdb.uk.net/
14	BS00095622	1BS	Failed	yes	AX-94449276	CGCCCCTCCTCACCTTGAACGTCCAAGGAAGCAGCACACAAGTCCGGCCAGCCAAGATGTCGTGGCAGACTTACGTCGACGAGCACCTGATGTGCGACATCGAGGGCCACCACCTCGCCTCCGCGGCCATCCTCGGCCACGACGGCACCGTCTGGGCCCAGAGCGCCGACTTCCCCCAGTTCGCGCCCGCCGAGATCACTGCCATCATGAAGGACTTCGACGAGCCGGGGCACCTCGCCCCCACCGGCATGTTCGTTGCAGGTGCCAAGTACATGGTTATCCAGGGTGAACCTGGGGCCGTCATCCGTGGCAAGAAGGGAGCAGGAGGCATCACCATCAAGAAGACCGGGCAGGCGCTGGTGGTTGGCGCCTACGAGGAGCCCATGACCCCTGGGCAGT…	GTGGGCCTTTTGTTTCCCTCC	ATATGTGGGCCTTTTGTTTCCCTCT	CGATGGATGCCAGAGCCGCTT	T	C	0	0	0	168	Transition	http://www.cerealsdb.uk.net/
15	BS00010735	1BS	Failed	yes	AX-94449276	GAATGAATGGACTTTTCTCCCCAACTGGATGGAGGACTCCTTCTTCGATGAGCCATATGAAACAACCGCTATCTGCCCGGGTTTCTGGTAGAGCTAAAGCAATGGACCAAGACGGTGCTAAAATAAAAAAGGTGCTTTTCGATTCAGCAGTCCATACAACAGCTGAAAACAC[G/C]CCAAGACGAGATGAAGTAAAGACAACTAAGAAAGAGGTACCCCCTTCGTTAACTCCTTGGAAAGAGGACAAATCTGAATCTCCTCTCAGGAAAGCTCTGTCTCCCATTCCTTCAAACATGATGACTCCTTGTAATGTCAATTGCCCTCCTTCATTGGAGCCCAAAACTCCAATAGGAGTTGAGAAGAATCCGGATGGTACACCTCTTGATAAGTTTAATGCA…	GTCTTTACTTCATCTCGTCTTGGG	GTCTTTACTTCATCTCGTCTTGGC	ATTCAGCAGTCCATACAACAGCTGAAAA	C	G	0	0	0	168	Transversion	http://www.cerealsdb.uk.net/
16	BS00022530	1BS	Failed	not	AX-94484634	ACGCCCAAGTATTCACCGTTCTCATTTCTCATGGAGCAACACACAGGCTACATCCAGGACATGAAGCAAGCGGGCAGATGAAACCATTTCCCCAAAGATCCTTGTAATTTACACCATGATGTTACAATCTGAACCACT[C/T]TGTGCAGTTCGCCGCAGTTTGTGGCTACAACTGGCAGCTAGTAAGCGCCAACGCCTCACTTGCCGGGGACAAAGTTTGTGGCAAACGCCCATGCATTGTTGTTGACAGGGTCGGAGAGGTGGTC	ACCATGATGTTACAATCTGAACCACTA	CCATGATGTTACAATCTGAACCACTG	ACTAGCTGCCAGTTGTAGCCACAAA	T	C	0	0	0	168	Transition	http://www.cerealsdb.uk.net/
17	BS00003743	1BL	Polymorphic	yes	AX-94666389	CTCCTCCGGTCCGGTCTCTCCCTCCCTCCCTCGCGTCGCCCACCACAGAGCACACAAGTCGCCGCGCCGCGACAGCTCAGCTCTTTCGTCTCGTCTCGTCTCGCCCCCTTCCAGTCCCTCCCTCCGGCGCGCGAGCGAGATCGATCGCCGCGGACCCTAGATCCCGATGGCCTCGCGCCGCCGCACCCTCCTCAAGGTCATCATCCTCGGCGACAGCGGGGTTGGGAAGACGTCCTTGATGAACCAATATGTGAACAAGAAGTTCAGCAACCAGTACAAGGCTACCATCGGCGCCGATTTCCTCACCAAGGAGGTGCAGTTCGAGGACAGGCTCTTCACCCTACAAATATGGGATACTGCCGGTCAGGAGAGGTTTCAAAGTCTTGGTGTTGCATTCTA…	TATCAAATGATTTCATCGAGTTAACATCG	ATCAAATGATTTCATCGAGTTAACATCA	GCGGAGCAGATTGTTGTGTTCTAGTT	C	T	159	8	1	0	Transition	http://www.cerealsdb.uk.net/
18	BS00022851	1BL	Polymorphic	not	AX-95108145	ATTTAGGCGGCGAGGCGATGAAGGTCCGCGCGGTAGAAGCGAAGTTGTGTGCCTCCTTCCATCGAAGCCTATATGGAGGGTAGAAGCGAAGTTGTGGAGGGGCCACT[A/G]TCGGCTAAGAGGTTGGCGACCTTGGGTAGGCGTCGTCGGAGTGACTGGCTTCCACACATTGGTGGCTAGGAGTGGCGGTGTTCTTCCCGCTTCTTTGGACCAAGAGGTTGGTGCCTCGGAGCGACCGATGTGGAGTGGCCCCCAGTCGTGAGCGGTAAAGCTCATTGCCCGCATGTCGGGTACTGAGTATTTGCAAGATGGAAAATGTTGNCCGGGTAGCCCAACGTCAATTTGTTCA	GTCGCCAACCTCTTAGCCGAT	GTCGCCAACCTCTTAGCCGAC	CCTATATGGAGGGTAGAAGCGAAGTT	A	G	153	8	7	0	Transition	http://www.cerealsdb.uk.net/
19	BS00108257	1BL	Polymorphic	yes	AX-94434557	GAAAAAGCAGAGGAGGATTCCATCTNNNNNNNNNNNNNNNNNNNNNNNNNNNNNNNNNNNNNNGCCGCGGGATCCACTGCGCTGCGGCGAGGACGACGGCGAGGCGACCCCGGCCCTGCGCACCAGGGGCGCGATGGCTGACCATGACCCAGAGTTGGAGGCCATCAGGCAGAGGCGAGTGCAAGAGCTAATGGGACAGCGTGGTGGTGCGGCAAGCCCACAAAATGCAGGGCAACAAAAGGCTCAGGAAGATGCAAAGCAGGAAGCTGAGGAACGCCGACAGATGATGCTTTCTCAGATACTATCTTCTGAAGCTAGAGAAAGACTCTCCCGCATAGCTTTGGTCAAGCCTGATAAAGCAAGAGGAGTGGAGGATGTTCTGCTGAGAGCTGCACAAAC…	CCTGAAACTCTCTGCGACACC	CCCTGAAACTCTCTGCGACACT	GGACTTGATAAATTGACCACAACAACTCAA	C	T	14	154	0	0	Transition	http://www.cerealsdb.uk.net/
20	BS00022093	1BL	Polymorphic	yes	AX-95257184	TCTGGTGTGTGTAAGGCTAGAGCAGGCAAGCGAGCGAGCGAGCGATAGAATCGAGAGAAGATGAAGATGGCTTGCCCTGCCCAATCCATGCTCTCTGCAAGCAGCTGCATGCTCCTCAGGAGCAGCAAGCCCCAGCAGGCCACGATTCCGCGAGGAGGCATCAACGGCGGCAACAGGTTCTTGACACTGTCCTGCAATGCTTCTTCGTCTCCTGACGACTCCGAGTGCAACGACGTGGAGTGCGCCCCGGAGAAGGAGGTCGGGAGCCTGAGCGTGGAGTGGCTGGCGGAGGAGAGGACCAAGGTCGTGGGGACCTTCCCTCCCAAGAAGAAAGGATGGACCGGCCTCGTCGAGAAGGACACCGCCGGCCAGACCAACATCTACTCCATCGAGCCGGCG…	GAGTATTCCGTGGTCTGCACG	GAGTATTCCGTGGTCTGCACC	CATCCTCATCCAGGTGAGCAAGAA	C	G	166	2	0	0	Transversion	http://www.cerealsdb.uk.net/
21	BS00077329	1BL	Polymorphic	yes	AX-94397585	AACAAATCCAATCGCCTCCCTCTTCCTGACCTCTCGTCTCTCCCTCACGATCTGGGCGGTTGTGTAGCCACTGTCGAACACCCCCATCCATGGAACGCCGCCTCGTCTTTGCCCAGCCGCCACCATCCTCTTTTTTCACGTTTTACCCTCAAGATGCAACAGGAGGGGCTCCACTCTCAGATCGGTCACGGTGCTACACCACTGAGACCTGAATCCGATTTGTTCCTACGCCATGTGTGGATT[G/C]CTTGGTTGCGGCCCCGCCGGATCTAACCTCACTCGATCACCCGGGCGAGGTAGGACCTCCTGGCAACCGTAAACCGAGCTGGA	GTTCCTACGCCATGTGTGGATTC	GTTCCTACGCCATGTGTGGATTG	AGATCCGGCGGGGCCGCAA	G	C	10	156	2	0	Transversion	http://www.cerealsdb.uk.net/
22	BS00022411	1BL	Polymorphic	not	AX-94481194	CAAGACCCAAACCCTAGCCGGCGGCGCCATGGAGGTGGGCGGCGACTCTCAGGCCCGCGGCGACCGCGCGCCCCAGATCAGCGACGACGAAGACGAGATCATCTACTACTGCGCGTTCTCTGAGCCCGAGTCTGACTCCGACGCGCCCCGCCCCAGGCCCGACTACAACAAGCCCATCCAGTTCGTCCCCGCTCGCACGGTGTTCCAGCAGCCGGACGGAGAGATGAAGCAGGTGCTGGAGCGGGCGCACGCGAAGGCCGAGCGCCGCCGCCAGCGTGAGTTGGCCGCCGCGGCGGAGGGGATCGTCAAGCGGCCCAAGATCACCATCCGCCGCTCCTTCGCGGGGGCTCAGCGCCTCAAGGGACCCCAGATCCCCCGTCTCTACGGTCATATCAAGAA…	TTATCTGTATGCATCTATGACTATCTAG	GTTTATCTGTATGCATCTATGACTATCTAT	GGCATTGTTTTGCCTTATAGGAGATACAA	C	A	51	117	0	0	Transversion	http://www.cerealsdb.uk.net/
23	BS00010888	1BL	Polymorphic	not	-	TGGGAATGCTGAATCATGCTTTGCCTAGCAAATCAGAAAGAGACGCCTGGTTTGAAGTGAACAACCAAATTTTGAACGCATTATTCACACTGATGTGCCTTTACCAACACCCAATGCGGATCTATAACTTTGTGCTTTTGTGTCGATGGGACCAAAAGGACATTTTAAGGCTTAGGAAAGAATACTGCAAAAATGGGACATATAAGCCTAATGAGTGGATGCACATGATGGTGGTTGTGGTCTTTCTTAATCTGAACTGCTTCGCCCAGTATGCCTTGTGTGGTCTCAACATAGGGTACCGCAGATCTGAAAGGCCTCCTCTTGGTGTCGCCGTGACTATTTCTTTTGCATTTGGGGCTGCGTTATTCGCCAGTGTGTATAACATTGTCAGTCCTCTTG…	AGGCACGGCTGGTCAGTCC	AGGCACGGCTGGTCAGTCG	GCTGATGGGCTCTCCATGATGAAAA	C	G	29	138	1	0	Transversion	http://www.cerealsdb.uk.net/
24	BS00012056	1BL	Polymorphic	not	AX-94461977	GGGGAGGCACCAGGTGATGAAATGGAAAACACGGATGCAGCTGAATCACTGGGTGGGGAGGTTGGTGTAGGTGAAGCCACAGGCGATTCACCAGATGAGAGAGTTGCTGTTGAAGCACTTGCCGGTATGTCCACCCAAGGTGAAACGGCTGCTGAAGCAGCTGATGCTGAAATTGCAACAACTGGGAAAACAGCAGAGGGTGTCGGTGTTAAAACTCGAGGTAAGAAGGCTACAGCAGCCAAGAAACCTGTAGAGAGTGCCACGGCTGAAGCACCAGGTAAGAAGGCTACAAAAGCCAAGAAACCAGTGGAGGATGCCACAGTCGAAGCGCGGGATGAGAAAGCTGCAACAGCCAAGAAAA[A/G]CGCAGAGGGTGCCACAGTCGAAGCGCCGGATGA…	ACTGTGGCACCCTCTGCGC	GACTGTGGCACCCTCTGCGT	GATGAGAAAGCTGCAACAGCCAAGAA	G	A	81	87	0	0	Transition	http://www.cerealsdb.uk.net/
25	BS00023148	1BL	Polymorphic	yes	AX-95101816	CCTTGGGTGATCTTGGAAAGAAAGAAGCCCCTTTTTTCAGGCTTTCCCTTTCCAGTGTGGTGCGAAGCGCTTTCCGGCGTATAGCTTACCTTTGCTTGTGTGCTGTTCCTGAGTGGAATAAAGCCAGAGCGTGCATTCTTGTGGCTTGGGATAGGGTAGGATTCTTCCTTCTTCCACAGCCATGTGCTGGATGCAGCTTTGAGCTTTGGTAATTGCTTCTAGGCTCTAGCCACCCCCAGTCCCAGCTTTAGCCATCAAGATCCAGCACCAAAAAG[C/T]CTTGAGCTGCATTGTAGTGAGGGGTTGTCTTGTCCCCTAGCTTGGCTCACTCTTTATTCCTCATATTATCTGTCCTTACTCTGGCATTAGATCAAAGATCAAGAACACAACTCCCTGTT…	CCTCACTACAATGCAGCTCAAGG	CCTCACTACAATGCAGCTCAAGA	CTTTAGCCATCAAGATCCAGCACCAA	C	T	21	140	6	1	Transition	http://www.cerealsdb.uk.net/
26	BS00004129	1BL-1	Polymorphic	yes	AX-94783957	GGCGAAACTAATACAGCCCAGAATGGGGAAGAGAACGATCAAACAGAAGCACATGCTGTATCTGCTGTTGAAAATGAGGACAATGCAACGGCGAAGCTTGAAAAC[G/C]TTAGCTCAAAGTCAATAATTGTGGATAATGATTCAGACTTGCAAAATGAGTTGGTACCAGCTGTTGCATACAATCCTGTCGGTCCAGTAGAAGTTGATTCTCATGCAAATGATTCGCGAAAAGAGGAAAAAATTCAGGACTCTGTTAC	ATTATCCACAATTATTGACTTTGAGCTAAG	ATCCACAATTATTGACTTTGAGCTAAC	GACAATGCAACGGCGAAGCTTGAAA	C	G	8	159	1	0	Transversion	http://www.cerealsdb.uk.net/
27	BS00003807	2AS-5	Polymorphic	not	AX-94903804	GTTAACAAGCTCAGAGGTATTATTAATGTTGCGGCGATCAAAGCCCCAAGTTTCGGTGAGCGGCGGAAGGCTGTCCTTCAGGATATTGCCATTGTGACAGGTGCTGAATACCTGGCGAAGGATCTTGGTCTGTTGGTTGAGAATGCAACAGTAGACCAACTTGGGACAGCAAGGAAAATCACAATCCATCAGACTACAACAACCCTCATAGCAGATGCGGCTAGCAAAGACGAGATCCAGGCCAGGGTTGCACAGCTAAAGAAGGAGCTTTCTGAAACTGATTCCATCTATGACTCAGAGAAATTGGCTGAGAGGATTGCCAAGCTTTCTGGCGGTGTGGCCGTCATCAAGGTTGGAGCAACAACCGAGACAGAGCTCGA[A/G]GACCGTCAGCTTCG…	CAACAACCGAGACAGAGCTCGAA	AACAACCGAGACAGAGCTCGAG	GTGGCATTCTTCGCGTCCTCGAT	A	G	1	167	0	0	Transition	http://www.cerealsdb.uk.net/
28	BS00004673	2AS-5	Polimorphic	yes	AX-94397650	TTTATGTGTAACATGTATCGAGAAAGACAAACCTCAGATTAGGTGACCCGTTGGGTTGACCAGTAACNNNNNNNNNGGTAGCTAGATTAAATTAAACTATTCGTCGGATGTGCTTGCAGGTTATGGACAATGGAGGAGAAAGAGATAGCTATTGTCACCCATTGCGGTTTCTTGTATCACACCCTGAACACGTATGGTAAAGAGTGTCATCCAACCGTAGCAGAGGAACTGGGCAAGGTCTTCGCCAACTGTGAGCTCCGG[G/T]CGATGGTGTTGGTCAATAGAAGTAAACTTGGATCTGATACCTCTACATACAACTTCGCTGGGAAGATACCGGCCGGGCTTGATTTGCCCAGCGATGTCGCAGACAAGAAGCAGGCTGAAGAAGCTAGCAAGAA…	CGCCAACTGTGAGCTCCGGT	GCCAACTGTGAGCTCCGGG	CCAAGTTTACTTCTATTGACCAACACCAT	T	G	163	2	3	0	Transversion	http://www.cerealsdb.uk.net/
29	BS00004727	2AS-5	Polimorphic	yes	AX-94898875	AGAAATAATTTCAACGCAACCACCTAAACACATCAATGGGTTGGAACGAGCAGACCCTCGCCTCCCCTGTACACCTTCCCAGGGCGGCAGTAGTAGCCCTGCTCCGGTGCACAATGCGAGTCTTCTGAGCAGACGCAAAGGCCCTCAATGGCGCAACCCTTCTCGACAATTATCGGGCTCCCATTAATGCCGAGCACCTGGTTACTCCATTC[A/G]CTGGAGAAGATCCCATCGGGGTCGTACCTTCCCTTCACCTCTAGGAACTTGCCGGCCTCGGGGTACTTGGCAATGACACCTTCAAAGGCAAAGTTGCGGNNNNNNNCCCCAGTGAGGGATGGCGCCATATTTGCGTAGCGCCATCTGTTGGAGCTCGTCGAGCACACCAGAGTATGGGTTGG…	CCCTGATGGGATCTTCTCCAGT	CCTGATGGGATCTTCTCCAGC	CCGAGCACCTGGTCACTCCATT	A	G	167	1	0	0	Transition	http://www.cerealsdb.uk.net/
30	BS00003694	2AS-5	Polimorphic	yes	AX-95215205	GCTTAAGAAAGGAATAGACAAAACTGTCCAGGGTTTGATTGAAGAGCTTGAAAGGAAAGCTAGACCAGTCAAGGGCAGTGGTGACATCAAAGCTGTTGCCTCTATCTCTGCTGGTAACGATGAACTAATTGGAGCCATGATTGCGGATGCAATTGACAAAGTGGGTCCAGATGGTGTCCTTTCGATCGAGTCGTCTTCATCTTTTGAGACTACTGTTGATGTTGAAGAAGGAATGGAGATTGACCGAGGCTACATTTCCCCTCAATTTGTGACAAACCTTGAGAAATCAATTGTGGAGTTTGAGAACGCCAGAGTTCTTATAACTGATCAGAAGATCACAAGCATAAAGGAAATCATTCCACTTCTGGAGCAGACTACACAGTTGAGATGCCCGCTGTT…	GCATTGTTCCCGGTGGTGGC	GGCATTGTTCCCGGTGGTGGT	GGACATAGGTAGACAGGTGCACATA	C	T	5	163	0	0	Transition	http://www.cerealsdb.uk.net/
31	BS00013085	2AS	Heterozygotes	yes	AX-94433842	CGTCGTTCCAGCACCACCATGGTGTACCACTGCCTTACACTGCAGGAAAAGCCAGTCGTGAGGGCAGTTGTCAAGAACATATATGGAATCTTTTGGTTCTGCCAATGTTCCGAGGCCACCCCAACCCTTGTTAATGATACCTCTCTGTCCAGTCATTTCGAGTGCCTT[G/C]ACAATGGTTTCAGTCATCTTTGCTGGATCTTGAACTGGAAGGCTACCAAAACCAACATAAATGGGTTTGTCACCCGCTTCAAGCCATTTCACAAGTTCTTCAGGTGGTACGTAATCAGACGCAAGATCGAGAAAGCAAAATCCAACAACATCGATCTTGGGGCCCCAGTCTTTCGGTTTTGGGACAAGGTGAGGGCTCCAGATGTATCCATGAGGAATGTCACTTC…	GTCCAGTCATTTCGAGTGCCTTC	GTCCAGTCATTTCGAGTGCCTTG	AAGATCCAGCAAAGATGACTGAAACCATT	C	G	18	5	145	0	Transversion	http://www.cerealsdb.uk.net/
32	BS00009848	2BS	Polimorphic	not	AX-94770581	GGGCATGTCGACCAACGCGTCGTCAGCAGTTGACGCAGTCAATTTCATGAACTCCGCTCTGCACATAGTAAGCAACACAAAGCGCGACCAAGATCAT[S]ACGGGGATCAGCAGCCTTAGCACGAGCCACAGCTTGCTGCCATCGGTCGTGAAGAAAGGCGCCAGAGGCCACAGGCTGCGCGGCTTCTTGCTTGGCCCCTGGCTACTCCCGCAGCCCTCATCGTCTTCCAGCTTGCTCAGCTTGTTGATCATGTTGCCGTAGAATTTGGCATCCCTTCTCTCGTACTCCTTCACCTTCTCCTTTAACCTCCGATAACCCATCTTTACATCCCTGTTCTCTGGATCTATTTCCAGTGCTCTCTTGATATCCACCTCTGCCAAATCAAAATCAACAAGATG…	CACAAAGCGCGACCAAGATCATC	CACAAAGCGCGACCAAGATCATG	GGCTCGTGCTAAGGCTGCTGAT	C	G	67	101	0	0	Transversion	http://www.cerealsdb.uk.net/
33	BS00014046	2BS	Polimorphic	not	-	TTTATTATTCGATAATAACGAAGCGGTGCTAAGTACGTTTACATAACACGAGAGT[G/C]TAATGTTACATTTCTCGCTTTTTCAGCTTAACCATGAGCCCATTTTTCATCTCCAATATACAAGACGGCTTGGCCTGGATGCTTTGCCCTTCCATCACCTCCACATCAAAGTTCCACAGAGTTGAGGCGATGACGGTCTTCATCTGCATAACCGCGATGT	AAGTACGTTTACATAACACGAGAGTC	AAGTACGTTTACATAACACGAGAGTG	CTCATGGTTAAGCTGAAAAAGCGAGAAAT	C	G	162	5	1	0	Transversion	http://www.cerealsdb.uk.net/
34	BS00014923	2BS	Polimorphic	not	-	CAGCTTGTCAGTGAAAACTGGACGAAAAAGTTGCAGGAAAAGGC[A/G]GGACATTCCTCACACGAGATAGACATCCTAGGAGTGACGTCATGTGTTGGGATTGCACTGAGGTGTGTGGACGAGGACAGAAACAAAAGGCCATGTATCAAGGACATCGTCCATGAACTGGATCAACTGGAAGCTAAGCTTAAAGCAATGTCACTAGCTT	CTATCTCGTGTGAGGAATGTCCT	CTATCTCGTGTGAGGAATGTCCC	GAAAACTGGACGAAAAAGTTGCAGGAAAA	A	G	165	2	1	0	Transition	http://www.cerealsdb.uk.net/
35	BS00005060	2BS-1	Polimorphic	not	AX-94503942	CCTCTTCAAACCACTACTAAACATTCACTTTGGTCTTTGCGCTGCATTCCAGATAGACATCCATACTCCTTGGCAAGGTCAATGCCTTCCTTCTTGGTGACAGCCCTCTCGCTCCCCTA[C/T]AGTCCAATGGCCATCTTCTCCATGGACATCCTGTAGCTACAGACACCCAGCAGCAGCAGCAATAGGTAGTAGAAGAAGA	GGAGAAGATGGCCATTGGACTG	ATGGAGAAGATGGCCATTGGACTA	GACAGCCCTCTCGCTCCCCTA	C	T	30	138	0	0	Transition	http://www.cerealsdb.uk.net/
36	BS00004224	2BL-6	Polimorphic	yes	AX-94442784	CCCGCAGATCCATCCACTCCAATCATCATGATTGGTCCTGGGACAGGGCTAGCACCTTTTAGGGGCTTCTTGCAGGAAAGATTAGCTCTAAAAGAATCTGGAGTTGAATTGGGCTCTTCAGTCCTCTTCTTTGGGTGCAGGAACCGTGAAATGGACTATATATACGAGGAAGAGTTGCAAAATTTCCTTCAGGAGGGGGCACTCTCCGAGCTAATTGTTGCCTACTCTCGTGAAGGACCAACCAAAGAATATGTGCAGCATAAGATGGTGGACAAGGCCACCGAGATTTGGAACGTCATTTCTCAAGGTGGTTACATATATGTTTGTGGTGACGCCAAGGGCATGGCGAAAGA[C/T]GTACACAGGGTTCTTCACACAATAGTTCAAAAACAGGGATC…	ATTGTGTGAAGAACCCTGTGTACG	CTATTGTGTGAAGAACCCTGTGTACA	TGACGCCAAGGGCATGGCGAAA	C	T	75	93	0	0	Transition	http://www.cerealsdb.uk.net/
37	BS00004378	2BL-6	Polimorphic	yes	AX-95113483	CAGACCCACCGCGTGATCCATTGTAGCGATATTGGGGGCGCGAGGAGGAGGAAGAGGAGTCCGCAGTCGGCACTGGGCAGGGAGGGTGAGAGAAGGGGAATCATGAGCGGAACTGGGTACACGGTGGAAGTCACTAACCTGTCAAGCAGCGCATCTGAGAATGATCTTCATGAGTTCTTCTCATTCTCTGGACCTATTGAGCATATAGACCTTATCAGATCAGGAGGATATGGTTCAACTGCTTATGTGACTTTCAAGGAACCCTATGCCTTGGAAACTGCAGTATTACTCAGTGGGGCGACCATTGTGGATCAGCCGGTGTGCATATCTCGTTGGGGACAGCCTGATGAGCCTTGTAATTTCTGGGACAGGCCAACTTGGCAGGTCGAGGAGGAAATT…	ACGATGGTGTTCATAACCTTGACC	CACGATGGTGTTCATAACCTTGACT	TCGCCACTGCCACCGGAAGAA	G	A	166	2	0	0	Transition	http://www.cerealsdb.uk.net/
38	BS00012830	2BL	Heterozygotes	not	-	AAATCTACAGGGAAGCAGTTACTCTACTGAAGAAGACCCAAAATGTGTTTCTGGGAATAAAGACAACAATGTACACACGCAGCTGGAGATCTCGACAGCATCAGA[A/G]AAGCTCATCGAGTGCCAGGAGACAATCCTAAGCCTGGGAAAGCAACTAAAAGCACTTGCATCGCCAAAGGATGCCACCTCGGTTCGTCCGGAGCGAAAACCTCGGTCTAAGTCACTGAATGAGATGCTAGCCGTCGACGACGGGGGATTTGATGACCTCAGCTCCCCGAAGACCAAGGAGATTATATGCTCAGAACTAAGGCCACCACATGAAAGAAATTTTTCTGTCGGCGGGGGAGGTGGCGATTCAGAATCATGTTATTCCCACCCGACGCCAGTGGTTCCACCTG…	GGAGATCTCGACAGCATCAGAG	GGAGATCTCGACAGCATCAGAA	GTCTCCTGGCACTCGATGAGCTT	G	A	18	89	61	0	Transition	http://www.cerealsdb.uk.net/
39	BS00004417	2BL-6	Failed	not	AX-94810852	AATCTCTGTCACGATCACACGGGCACCAGCCTGCTTGAGTGCGGCGGCACAGCCCTTGCCAACATCACC[A/G]TAACCGCAGACCACGGCAACCTTGCCGGCGATCATAACATCAGTGGCCCTCATAAGACCATCAGGGA	CAGCCCTTGCCAACATCACCG	ACAGCCCTTGCCAACATCACCA	GGTCGCCGTGGTCTGCGGTT	G	A	0	0	0	168	Transition	http://www.cerealsdb.uk.net/
40	BS00015274	3AS	Polimorphic	not	AX-95222099	CCGAGAGGAGGTCGTGGGAGGGCCCCAAGCCCATCTCGATCGTCGGCTCAACCGGTTCCATAGGAACACAGACATTGGACATCGTTGCGGAGAATCCTGACAAGTTCCGGGTTGTCGCTCTTGCTGCTGGCTCCAATGTCACTCTTCTAGCTGATCAGGTGAAAACGTTCAAGCCAAAGCTGGTGGCTGTAAGAAACGAGTCATTACTTAACGAGCTAAAGGAAGCGTTAGCTGGTTGTGAAGAAATGCCGGAAATTATTCCTGGGGAGCAAGGTGTCATAGAGGTCGCTCGCCACCCGGATGCAGTTACAGTCGTTACGGGCATAGTAGGGTGTGCAGGACTCAAGCCTACAGTTGCAGCAATTGAAGCTGGGAAAGATATTGCGTTGGCGAACAAAG…	CAAAGAGACGCTTATCGCAGGC	AACAAAGAGACGCTTATCGCAGGT	TGTGCGCAAGGGGAAGCACGAA	C	T	114	54	0	0	Transition	http://www.cerealsdb.uk.net/
41	BS00004158	3AS-4	Polymorphic	not	AX-94882276	GGCAATTAAGGCCACTGAAGAGAAGGAGAAGAAGCTCAAGTCAAAAAAGCACAGGAGGCGAAGCTATTCTTCCTCAGAATCTGACAGTGAATCCGAGAGCGACAGCGATCGGAAACACAGGAAGAGGAAGGACCGCAGAAGGCACAGGAAACATGGCCACTCTGACTCTGATGGTGCCAGGAGGCGCAAGCACAGGTCAAAGAGGAGGAGCTCAGACTCTAGCGATGAGAGCGACAGTGATGAATATGATAGCGAATCTGAAGAAGAGCGCCGAAGGAAGAAGCACTCGCACAGGAGGAAGCATCGCCGTCACTCTTCAAGGTCAGAGTCTGATGCTTCAGATTACAGCAGCGATGATGATGAGCGAAGGTCAACCAGGAAGGACCACACTAGGAGCCG…	CCTTGACCTGATCTTGTCCTCG	GCCTTGACCTGATCTTGTCCTCA	GCCACCGATCATCAGACGATGAAT	C	T	59	108	0	1	Transition	http://www.cerealsdb.uk.net/
42	BS00005117	3AS-4	Polymorphic	not	AX-94965847	GGCAATTAAGGCCACTGAAGAGAAGGAGAAGAAGCTCAAGTCAAAAAAGCACAGGAGGCGAAGCTATTCTTCCTCAGAATCTGACAGTGAATCCGAGAGCGACAGCGATCGGAAACACAGGAAGAGGAAGGACCGCAGAAGGCACAGGAAACATGGCCACTCTGACTCTGATGGTGCCAGGAGGCGCAAGCACAGGTCAAAGAGGAGGAGCTCAGACTCTAGCGATGAGAGCGACAGTGATGAATATGATAGCGAATCTGAAGAAGAGCGCCGAAGGAAGAAGCACTCGCACAGGAGGAAGCATCGCCGTCACTCTTCAAGGTCAGAGTCTGATGCTTCAGATTACAGCAGCGATGATGATGAGCGAAGGTCAACCAGGAAGGACCACACTAGGAGCCG…	GTCCTCGTCACTTGATCTGTGG	GTCCTCGTCACTTGATCTGTGC	GACAAGATCAGGTCAAGGCATAGGAA	C	G	59	109	0	0	Transversion	http://www.cerealsdb.uk.net/
43	BS00012743	3AL	Polymorphic	not	AX-95183381	CATCACTAGCAAAAGGACGCAGTGTGTCAGAACCTACCCACTACAGGCACATGGCTAACCAATGTGAGTTTTTGGTTATAGTCTAGTTTAGTGGCGCACCAGAACAGACGGTTCAGGTAGCAGCAGCATCCCAGGAAGCCATCTGATATTGCAATCTCACCTAGAAGGCATGCAGATCAAAATTTTGGCATTCCCAAGTTT[G/C]CAGACCCGGTCAAAGATCTGTGCTGGCCTTGCTCCCTTCGCCTGTAGGGTTTTCAGGTACAGCTGATTGTGGTTGATCTTGCTGCTGTCCTCCGCTTGTTTCAGGATGGAAATTGATGGGGAACTTGGTGACTCGGGGCTTGTCGGTCAAAATATTTCTCTGCACCCGGTCAATCAGCAGCTTCGCTGGGGGT…	ACAGATCTTTGACCGGGTCTGG	ACAGATCTTTGACCGGGTCTGC	GCAGATCAAAATTTTGGCATTCCCAAGTT	C	G	85	83	0	0	Transversion	http://www.cerealsdb.uk.net/
44	BS00018367	3AL	Polymorphic	not	AX-94545658	ATCCTTCCCCCTCCCAGCAAAGTTCTTGAACATGACAATATTGCCGCAGCTTCCCGTGCTCCAG[A/C]CGCAACCTCCCAGTCAACCGACGTTGGCTACACCGCTTCGGATGAAAAGGTATGTCCCATCTGCTTA	GCAGCTTCCCGTGCTCCAGA	CAGCTTCCCGTGCTCCAGC	CAACGTCGGTTGACTGGGAGGTT	A	C	167	1	0	0	Transversion	http://www.cerealsdb.uk.net/
45	BS00018474	3AL	Polymorphic	yes	AX-94550243	TTTTTTTTTTTTTTTTTTTCTTTTTTAATTTAAAATAATGCCACCTCCCTTGCAAGAAAACACGGCGGATTTGTACAGACGCATCAATCAACCAAAAAACAAACATATCCCGGGTGAAACGGCAGCTCAAGAACCACATCCATATGTACACACTTGCAAGTACCACACACGGTTCGCTGGATCCATCAGCAGCAGTTTCTCGTTTACCTGTTCTTTCCTCTCTCTTTTGGTTGTTTTCGCATGCCAATGGCCCTTGAAAACCTGCATCCATTTCTTGCGCTGGAGTTTGGATCATTCCTGGTTGGGTGTAGATACTCGAGACCGGCCCCTGCTCCCATCTTTGGGACGGGGGATTCATCGGCCCTGCAAAACTCGACGCAGACCGATGCCTGG[C/T]G…	ACGCAGACCGATGCCTGGC	GACGCAGACCGATGCCTGGT	GGCTCGATCGGCTTTCGGAGAT	C	T	10	158	0	0	Transition	http://www.cerealsdb.uk.net/
46	BS00003837	3AL-3	Polymorphic	not	-	GCCATCGCTGCGATGCTTGGAAACTGACCTTCAAGACAATCAGGTGGTGTGTTAGACTTT[C/T]GCGATTGCTTTCCTGGACTCGAAGCTCCATGAAAACTAGGGG	GAGTCCAGGAAAGCAATCGCG	CGAGTCCAGGAAAGCAATCGCA	AAGACAATCAGGTGGTGTGTTAGACTTT	C	T	167	1	0	0	Transition	http://www.cerealsdb.uk.net/
47	BS00016725	4AS	Polymorphic	not	AX-94512544	ACCAAATCTTTGTGATTTGACCATAGAGCAGGTTGCAGCAC[A/C]AATCCACCGGAGATAGCCTCGCGCCACCTCCCTCGCAACGGTTGAGGTACATCACCGTGAGGCTTTGCAAGTAT	CCATAGAGCAGGTTGCAGCACA	CATAGAGCAGGTTGCAGCACC	GCGAGGCTATCTCCGGTGGATT	A	C	167	1	0	0	Transversion	http://www.cerealsdb.uk.net/
48	BS00003776	4AS-4	Polymorphic	not	AX-94506228	AAGGTGGAGCATTTGCGAAAACTTTATTCGGTGATGAACCGACCAAACCAGAGTACAGAGCTGTACCAGCTGCTGTTTTCTCCCAACCACCCATTGGGCAAGTTGGCCTTACCGAGGAGCAGGCTATTGAAGAGTATGGAGATGTTGATGTCTACTTGTCAAACTTCAGACCTCTTAGAGCCACTCTTTCTGGATTACCTGATCGTGTACTAATGAAGCTCATTGTGTGTGCTACTACGAACAAAGTTGTAGGAGTGCATATGTGCGGTGATGATGCACCTGAGATAATCCAGGGAATTGCAATTGGTGTTAAAGC[C/T]GGGTTAACGAAGCAAGATTTTGATGTCACTGTTGGCGTTCACCCAACATCTGCAGAGGAATTTGTCACTATGAGGAGT…	GGGAATTGCAATTGGTGTTAAAGCC	AGGGAATTGCAATTGGTGTTAAAGCT	CAACAGTGACATCAAAATCTTGCTTCGTT	C	T	1	167	0	0	Transition	http://www.cerealsdb.uk.net/
49	BS00005047	4AS-4	Monomorphic	not	AX-94529131	GTCAAGAGAAGCCAGATCACAGCCACTTCACGATAAAAAGGCCCCTGGAAAGAAGCCACCTGCTGGTGCTCCCGCCCCTGCGCCTGTTTCGGCTGTTGATGCTTATCAGAAGATGCTTTCATCTATCGCTGAGTTCTCTGGGTTTGGAAGGCTCTTCAAGTCCTCAGAACCTGTGGAGCTGACAGAGGCAGAGACTGAATATGCAGTTAATGTGGTTAAGCATATCTATGAAAACCATGTTGTATTGCAGTACAACTGTACAAACACCATACCTGAACAACTGCTAGAAGATGTTACAGTATATGTTGATGCCACGGATGCTGAAGAGTTTTCAGAAGTTTGTTCAAAGCCTCTTAAAAGCTTGCCTTATGATTCACCTGGGCAAATTTTTGTTGCTTT…	TGGGCCCGCTTAGTCCG	CTTGGGCCCGCTTAGTCCC	GGCGTCAAGGTTCTTGTCAGGTTAT	C	G	168	0	0	0	Transversion	http://www.cerealsdb.uk.net/
50	BS00016097	4AL	Polymorphic	not	AX-95208962	TGTCTAGCATGCAAGCTGCTGCAGAGTACTTATATGACATTTTGACGAAGGCTACTGTGGTGAAGAAAAGGGTTCCTGTTCTTATATTCTGCAATAAAACAGACAAAGTTACGGCTCACTCGAAGGAGTTCATCAAGAAGCAGCTGGAAAAAGAAGTGAACAAGCTTCGGGAATCGAGGAATGCCATATCATCTGCTGACATCACTGATGAAGTC[G/C]AGCTTGGTGTCCCTGGAGAGGCATTCAACT	GACATCACTGATGAAGTCC	GCTGACATCACTGATGAAGTCG	GAATGCCTCTCCAGGGACACCAA	C	G	127	40	1	0	Transversion	http://www.cerealsdb.uk.net/
51	BS00014101	4BL	Polymorphic	not	AX-94679343	AGACATAATCTTGGTGAGATAAGCATCTCTTTCAGATGAACCTCTTGTACCTTCAGCATCCTTGACGACGGCGACGATGGCCTTGGAGTTGTCGGGCACGGGCACGATGGCCTTCTCCTCGGCGATGTCCTTGGTGGCCGTGGTCGTCTCCACCTCCACCTTCTTCGCCTCCTCAGCCGCCATCTGCTCTGCTCGGGTCGCTAGCTTCGAGCTCGATTCGACCAAGAAAAGGCCTCGGCGATCGAGATCT[A/C]ACAAGCAGCAGCTAGCTTATAAGCAGCTTATAACTCGCTGGGTGGTGTGTATGGAAGAAGATGTAGGCTTATGTTCCCCCCGTACTCTGCGTTGGATACCAC	TATAAGCTAGCTGCTGCTTGTT	CTTATAAGCTAGCTGCTGCTTGTG	GAAAAGGCCTCGGCGATCGAGAT	A	C	162	5	1	0	Transversion	http://www.cerealsdb.uk.net/
52	BS00009274	5AL	Polymorphic	not	AX-95191949	GCATTTCTGTAAACCATGTGCTTGCCCTGGGAAGATCTCAAAAACATCAAAGAGCCCCGGCTTGGGGTCACAATCACACTATCAGTGTAGCTACTTCAGTGTCAGCTTCCAACTGTATAATGTTCCCAAAAAATGTCACTTCTTGAGCAACCTCAGTACATCGCCGATGAGATGCAGGGAGCCAGTAACCAGGACCTGATAAGAAGTAGATGGATCCTCTATGGCATTTTTCCTTAGCCACTCAATTGCTAGTGGCAGTGATTCAAACACTAGGCTAGTCTCGCCAGAATCCGTGCTGTTTGAACCTTTATTGTCATCATGAAGTAATTTCTCCCACACTGCTTGGAGAGATAGCTGCCATGACAAATCAATTTGCTCAGG[G/C]CCAGCAGGTGCTG…	CCATGACAAATCAATTTGCTCAGGC	CCATGACAAATCAATTTGCTCAGGG	AGTCACAACACAACAAGCTTGGTTCTAA	C	G	63	105	0	0	Transversion	http://www.cerealsdb.uk.net/
53	BS00012772	5AL	Polymorphic	not	AX-94997523	GCAGTGTCAGCCACTTCTGTTACATTGCCCATTCACAATGGTGATTCTCAGGGACAGAGACAAAAACCTTATAAAGATGAAGCTCCGATAGAAGCAGTCAGGAAAGAGTGCAAAAAATGCAATTTGACTTTTGAGGACCAGGGTGCCTATGTGCAGCATCAGTTGTCCTTTCATCAAAGGAAAGCTAAAAGGCGCAAGGTTGATAAATCTGTTGGCCTGGGAGTCGGTAAAGATGGAAAGCTTGAGACTCAGGAAAGTCAGAGGACCTCTGAAGATAAACCTGGCTATTTTGGCCATGGTGTAGCTGATGTTAGAAGTCAAGGTCAGAGTCCAGCAGAACTGTTTGGCGGAGCTTCTTCAGGAGATGTAGGTGCTCAACTATCCTTGGCTGCGGCACCA…	AAACAGGAGAAGATATTGTATCTAAGCAT	ACAGGAGAAGATATTGTATCTAAGCAC	TGTCAGAATAAAGGAGGTCAACCTCAATT	A	G	98	68	2	0	Transition	http://www.cerealsdb.uk.net/
54	BS00082002	5AL	Polymorphic	not	AX-95148754	TAATGAAAAAACATAATTTACAAAATTATTTTCAAAATAGCCTCATTTGTTCTTGAAAAGGAGACCGGACGTGATTCTAAGAAACAAATACTAGGAAACAAATCAAAATTAACTAAGACCAAAGCATTCTCAAGGGGAAGCTCCCATTCAACGCCCGATAAGACGCTAGGGAGTGGTAGTCCGATTACCATACCTAAACCCCTTGGATTTGATTTTATGGCAACGGCTGCAGAGCTTCTTCACACTTAACTGAACCGTGGAGGGAACTTTCTCCACGACATATTTACCAATAACCCCCAGCCCTTTGTGGGCGTGCATGATCATACTCCTGCTTTTCGGGTTGCATTCACCTTTTTCCCCGACACAACATCTTTCAGCGTCTCCATAACTACTATTGTC…	CCATATTCTTGAGAATGAGACTGCG	GCCATATTCTTGAGAATGAGACTGCA	CTATTGTCGTATATGGCGTCCAAGGTA	C	T	2	166	0	0	Transition	http://www.cerealsdb.uk.net/
55	BS00094343	5AL	Polymorphic	not	AX-94963184	TTTCACCCCCTGGACCCAACCACTGAGCCTACACTTCAGATAGGGTATACTCAGGAGCAGATAAACAACGCATGCGTGGCGGCGTCGTTCATGCCGACATGGCTGCCCTGAAGATCGACGATCCAACCAGCTAATAAATGTGCGACGGTGCTTGCACAGCCGTCGCATTCTACCTACGTACCTACGTATATTCCGGGGCCGGGAGCGACTACTATCGCGTTCGCGTACGTCCCATAGTTTGTTCTGTGTCTCTGTTGTGTCCTTGTGTGAAAAACTTTTGTGATCGACAATGATCGACGTCTATGTCAAGACTGTCTGGTACAAAGGGCCGTCCGT[A/G]CGTCGCCGTTACCATAGGCTGGCTAGCTGCAGCATAAAAAGACGTATAGTGCAGTGCC…	AGCCTATGGTAACGGCGACGT	GCCTATGGTAACGGCGACGC	GACGTCTATGTCAAGACTGTCTGGTA	A	G	166	2	0	0	Transition	http://www.cerealsdb.uk.net/
56	BS00066143	5AL	Polymorphic	yes	AX-94686717	AAGCAGTGGTATCAACGCAGAGTCAGAACTCAGAACATGTGTCCTATGCACCGTGCCAAGAGAACAAGCCACTTCACTGTCTAGCCACAGCAAATTT[C/T]GCAGATAATATTGAAATTTCTACAAGCAGTGAATTATAGTAGTAAATTTCTGCACATTTAATCTTCATCTGGAGCTTTTGTTAAGGCATCAATCAGCTTGAGACCACAGTCGTATGATTAACTCAGGAGATTCTGTCCAAAATTTAGCCTTCCCAAGGCGGCAGACAAGATTGCAAAGCAAAAAGATGACCTAGTCCAAAGCCCACAGCTAGCACATGCTGAAACTGTACGAGGCCAAAATAATGGTGACACGGACATAAAGACACTGTGTGTTGACTCCCCCGCGTACTCTGCGTT…	TGTAGAAATTTCAATATTATCTGCG	CTGCTTGTAGAAATTTCAATATTATCTGCA	CACTTCACTGTCTAGCCACAGCAAA	C	T	163	3	2	0	Transition	http://www.cerealsdb.uk.net/
57	BS00010757	5AL	Polymorphic	not	-	ATGGGACACCAGTAGTCAAACTCTCTGATTTCGACAGATCCATTCCTTTGCATTCTCTATCCCATACATGCTGTATAGCTCACCTTGGCACATATCCACCCAATGTTTGTGTTGGGACACCTTGTTGGATGGCTCCAGAGGTTCTTCAGGCCATGCATGAGAAAACCCAGTATGGACTGGAAGTGGATATCTGGTCATATGGATGTTTTATATTCGAGATGCTTACACTTCGTATACCCTACGAGGGACTACCAGATTCAGAAATATATGATCTCATAAAGAGGAAGAAACAAAGGCCAAGGCTAACTAAAGAATTAGAAGCGTTCTGGACAGTGGACGAGCCAATTACAAGGCTGAAGTTGGGGATCACATCTGATGCTCATGCAGAGAAACTAAGAT…	TATGGAAAATTGGAAATTACTATGAAGAAGAT	ATGGAAAATTGGAAATTACTATGAAGAAGAA	GTCGTGTGTGTATGTGTATGTCATGTAAT	A	T	165	3	0	0	Transversion	http://www.cerealsdb.uk.net/
58	BS00075379	5AL	Polymorphic	not	-	TGTTAGGTGTAGAACACATTGCTAATTGTCTATAGGTTCGGTATAATACTGTTTGATCTGCTCTAACTGAACTGCACCCACATGATTAAGACAATCTCTTGACAGACCACACAACAAGTAGTAAACAAACATGAGTAGCCCAATGACTGCATGTGTACTCCATGTAGCATCATACACTGCACATGGACACACGTCACACG[G/T]TCAATTGCTTAGGCCAAGACATCTTACACTGTTTGCCTAGTTAGGTGTAGAACACATTG	ACATGGACACACGTCACACGG	CACATGGACACACGTCACACGT	AGTGTAAGATGTCTTGGCCTAAGCAATT	G	T	166	2	0	0	Transversion	http://www.cerealsdb.uk.net/
59	BS00005311	5AL-12	Polymorphic	not	AX-94391951	GTGTTCAAGAGAAGAGAACTTAACAGCCTGGTGCGTGCAATGGGGAGCTCAGCATCCCTCTGTCTAGTTATCACCTTGTTGGCATTCTACTTCTTGGTTCCCTCCAACGCTATACCCCTCTCAAGAGTGCAGAGACTGGTGCCCTTGCAACATGCCAGTGAGCAGGTGCCATGGATCGAAG[A/G]AAACACTCCTAAGCCAAAGATGGACATGGGTAGAGTGATCCTAGAAGATGACGCGGTGAATGTCAGTGCAAGGATGGCTCTGGAGACGCAGGACTACGCGCCCTCGGGCCCGAACAACCACCACAAGCCACCGGGTTGGAACTAAGCTAGCGCATCCCGGGTCACAACTTTCATAAAGTTATATCGGTGGTTTCATTTAGTTAACCAGCCGTG…	CCATCTTTGGCTTAGGAGTGTTTC	GTCCATCTTTGGCTTAGGAGTGTTTT	GTGAGCAGGTGCCATGGATCGAA	G	A	14	154	0	0	Transition	http://www.cerealsdb.uk.net/
60	BS00003767	5AL-12	Monomorphic	not	AX-95240270	GGAGGGGAGGGCGGGATGGAGGGGGGACGATGACTGCGCGCGCGGCGGCGGGATGAGGACGATCTGCGATGTGTGCGAGAGCGCGGTGGCGGTGCTCTTCTGCGCGGCCGACGAGGCCGCCCTCTGCCGTCCCTGCGACGAGAAGGTACATATGTGTAACAAGCTTGCTAGTCGGCATGTAAGGGTTGGGCTTGCGGACCCTAATAAATTAATACGCTGTGATATATGTGAAAGTTCTCCTGCTTTCTTCTACTGTGACATAGATGGTACATCACTTTGCCTGAGCTGTGATATGGCTGTTCATGTTGGTGGGAAACGAACCCATGGAAGATACTTGCTGCTAAGACAACGAGTCGAATTTCCAGGAGATAAACCAGGGCATATGGACGATGTAGCCAT…	CCATGACTCTTCAGGAGTGGTC	AACCATGACTCTTCAGGAGTGGTT	GGTGGCTCCATCGTAATTGCATGTT	C	T	168	0	0	0	Transition	http://www.cerealsdb.uk.net/
61	BS00026513	5AL	Monomorphic	not	AX-94442444	AAGACGGTACAGAGTAGTATTTCTTTGTCGTTGCTAATGTTCCTGAATTCGAAATTCTGAATATGACTGAATTCGAGATCTGAATTCAAGCATCCAATGGAGAGTTGGTAGACAGATTTCCAGGTCCAATGCTGGTGATGTTAACACGAGATCTGGCACGGCTGCGGATCACGCGAACCATAACACGGACGCACTGAACCGACAAGGTCGATGATA[C/T]GGGCAGCAGTAAGCAAACATATGTCGCTGAAATTACTATATTGTTGGGCAAACACAACCGGACGGAGGGAAGTGGCACACAGTGCGGGCAAATCTTCCCATCCCAGCTCTAGGGAAGTACTACAAAACTAGTTGAAGTTGCAGTTCCCCAGAAACCACAGTAGTGCTAGTACTAGTAC…	ATATGTTTGCTTACTGCTGCCCG	ACATATGTTTGCTTACTGCTGCCCA	CACTGAACCGACAAGGTCGATGATA	C	T	168	0	0	0	Transition	http://www.cerealsdb.uk.net/
62	BS00017579	5AL	Monomorphic	yes	AX-94509664	GTTCCAGCTTGCATTCGGCACATCGTGGTGTTCGTGTTNNNNNNNNNNNNNNNNNNNNNNNNNNCTCATCCATGGCTAGAGAGATGGAGAAGGCAAGGAAGGCCACCTCCCCTAAGACCTCATCAACTAGTTCAGGTCCAAAAGCCCAGCAAGGAGTGGAGGGTCCCCTCCTCATAAGAAGAACGTCACCGAGGCACGACCAAAAAATGAGCAGCAGAACTTCCGTAAAGGCGGTCAAGACTCGGCAACTCATGATGAGAGCAAACGCCGTTCACCAACTTTACAAACCTCACCCAAGAGATCGACAAAACACGAGCAGCCACTGAGCTACTGCAGGCTTCACACCGAGGAGCGGGCAATAAGGCGAGCTGGTTACAATTACCAGATTGCAAGCAAGAT…	CCTCAAATCTCCGAATAATTTCCTCT	CCTCAAATCTCCGAATAATTTCCTCC	GGTTACAATTACCAGATTGCAAGCAAGAT	A	G	0	168	0	0	Transition	http://www.cerealsdb.uk.net/
63	BS00077936	5AL	Heterozygotes	yes	AX-94470927	TTTTGTACTAGTCTCCCCATTGGTAAGCTTCCTGCGCTTTTGACTAGTCTCCTGTTAGAAAACAGACTCCAGTCTGTTAGCACACCCCCAGAAACTGATTATCCTATACGGACATCAGATATCATGGAAATCAAACTTGAGAATTCCTAATTGGGAAGCTTTCCAGTAAGCATTGATACAAAACAACCATGG[C/T]CACCTTCAGTTGAGAGTTGTCGGCATCAGGAAGAGCTTCACGGGGCTTCGGAATCCGCCAAGTCACGCTCTTGAAGTTCGGCGAGCTTGGGATTGGGCACCGGGGAGGAAGGCTCGGAGTAGGCCGCCTTCCACCTCTCCCTGCTCGCCTCCGCCTTCAACCGCAGTCCGCAGACCATAATTAAGCCAGCAGCATCAGGCGC…	GTAAGCATTGATACAAAACAACCATGGA	AAGCATTGATACAAAACAACCATGGG	CTGATGCCGACAACTCTCAACTGAA	A	G	1	2	165	0	Transition	http://www.cerealsdb.uk.net/
64	BS00009369	5AL	Failed	not	-	CGAAGCCAAACCCTAACCCTAGCGGGGCGACGGCGATGCCGAAGGCCGGCGGCGGGGACGAGGAGGAGTTCCGCGCCGAGGTGGAGGAGCGGCTGATCAACGAGGAGTACAAGATCTGGAAGAAGAACACGCCCTTCCTCTACGACCTCGTCATCACCCACGCGCTCGAATGGCCCTCGCTCACCGTGCAGTGGCTGCCCGACCGCACCGAGCCCGCCGGCAAGGACCACTCCGTGCAGAAGATGGTGCTCGGGACCCACACCTCCGACAACGAGCCCAACTACCTCATGCTCGCCCAGGTCCAGCTCCCCCTCGACGACGCCGAGGCCGACGCGCGCCACTACGACGACGACCACGCCGACATCGGCGGCTTCGGGGCCGCATCCGGCAAGGTGCAAA…	TGGGATATGCGTACTCCTGCC	GGGATATGCGTACTCCTGCG	ACCACAGACTGTACAGGCTTGGTA	C	G	0	0	0	168	Transversion	http://www.cerealsdb.uk.net/
65	BS00066421	5AL	Failed	not	AX-94534554	AAGCAGTGGTATCAACGCAGAGTACGGGGGGACCGATCCTCGCCAGCGGACAATAATGAACGTGCATGTGGTAATTTTCCTACCTCGCTGCTTGATCGCTTGCAATCGCACGCTCGTGGTAATT[A/C]TCCTACTACTACTGATGCATTTGAATTAAGCCATGTGATGTTTCTACCCAATAAACTATGTGTGGTGTTTACACGCGAATGTCTTGTATACACCTTGTATGTGCAAGTGCTGGGAATGATACTTTTGCTATATGTTCAGTTGCNNNNNNNNNNNNNNNNNNNNNNNNNNNNNNNNNNNNNNNNNNNNNNNNNNNNNNNNNNN	TAATTCAAATGCATCAGTAGTAGTAGGAT	CAAATGCATCAGTAGTAGTAGGAG	TTGCAATCGCACGCTCGTGGTAATT	A	C	0	0	0	168	Transversion	http://www.cerealsdb.uk.net/
66	BS00004698	5BS-8	Monomorphic	not	-	GGATCAGGACTGACATGTGGACACTAACCTTGGGTGTTTTTGTACCTAGGCTTGGTGACT[G/T]GTGAGCGAGGTTTGCTGATGTTCTTGGTTTTTACGAGAGACTTTCTTGAGTGAAACTCC	ACATCAGCAAACCTCGCTCACC	AACATCAGCAAACCTCGCTCACA	CCTTGGGTGTTTTTGTACCTAGGCTT	G	T	0	168	0	0	Transversion	http://www.cerealsdb.uk.net/
67	BS00004142	5BL	Monomorphic	not	AX-94721310	GTCNNNNNNNNNNNNNNNNNNNNNNGCCGCCGCCACCCACAAACCCTAGAAACCCTAGCTCTATCCCCGTCGCCCGAGACAGCCATGGCGGAGCACGACCTGACGGCGAGCGTGGCGGCGTGGATGGACCCCCACCTGGTGCTCCCGGTGCTGGAGTTCCTCCAGGAGCGCGGGGTCTACGCCGACGAGGAGATCCTGCGGGGCAAGATCCGCCTCCTCGGCGGCACCAACATGGTCGACTACGCCATGGACATCCACAAGTCGCTCCACGGCACCGACGACGTCCCCGCCGACATGGTCGCCCGCCGCTCCGAGGTCGTCGAGAGGCTCCGGGCCCTCCAGGAGGCCGTCGCGCCCATCGTCGCCTTCCTCTCCAGCCCGCAGCTCGTGCAGGAGCTC…	ATTCCTCTCTTCGACGCGCTTC	CATTCCTCTCTTCGACGCGCTTT	CGAGTGCGAGCAGGTTATACTGAAT	G	A	168	0	0	0	Transition	http://www.cerealsdb.uk.net/
68	BS00006033	5BL	Failed	yes	AX-94766462	GACGCGCCTCTCTCCTCACTCGCTCGGCCCCTCCCTCTCCCCCATTCTACCCAGTCCACTCACCCACCCGTGCCCGTGCCCGTGCCCGGCGACGACGGCGAGGAGGAACCAAGGAAGAGAAAGAAAGGGGATCGCGGAGCAGCAGCCATGGGCGTGATGGGCAGGCTCAAGATCTTCGTCGTCAAGGAGCCCGTCGTCGCCGCCTCCTGCCTCATCGCCGGATTCGGTCTATTTCTTCCAGCGGTTGTTAGGCCAATGTTGGATTCTTGGGAGACTGAGAAAAATGCCAAAACCCCAGTTGAACTAAAAGATGTGGTCGCAGGTGTCACTGGCAAGAAAGCTTAGTGATCAA[C/T]GTCTCTTCACTCTGCTGATGTTGTCTACACATTTTGTTCCGC…	AACATCAGCAGAGTGAAGAGACG	ACAACATCAGCAGAGTGAAGAGACA	CAGGTGTCACTGGCAAGAAAGCTTA	C	T	0	0	0	168	Transition	http://www.cerealsdb.uk.net/
69	BS00015223	6AS	Polymorphic	yes	AX-95084685	ACGCCGCCATTTCCACCCGNNNNNNNNNNNNNNNNNNNNNNNCANNNNNNNNNNNNNNNNNNNNNNTCTGCGCTAAGTCCAAGGGCTGCGCTCGTGCTCGGGAACCCTCGCGGCCGCTGACGACTCGCCGGGTCTGCTTGCTTGAGGAGCGGTGCCTGTCTGCCTGCGCGCGCTGCGAGGGTGGCGGTAACTTCTTCTGCGGTCTCGGATCGCGTCGGATTCGAGTTTCCCGGGCGGCTGTTCCCCGGGGCTGGAAGGTGGATTAGGCTGCGGTTGGTCAGGATATGATGGCAGCTGTTTAAGGTTGGTGAAATGTCTGTGCGGATATCATAAGTGCAAACTATTTATTGAACTGACAACGGCAAGGCAGACATATTTTGAGAATATAAGTAATGGGTT…	CCTCATGCTCCTGATCTTAAGGTT	CTCATGCTCCTGATCTTAAGGTC	CAAGCCCGCTACAATTAGCGACTTT	A	G	152	16	0	0	Transition	http://www.cerealsdb.uk.net/
70	BS00005092	6AS-1	Polymorphic	not	-	ATCTTCACCTTTGCCAATATTCTTTGAGAACTTGGAAGATCCCTGGCCTTGTTGTCCTTC[G/T]TTAGATGGTACAGAGTGTTTTGCCAAAG	GGCAAAACACTCTGTACCATCTAAC	GGCAAAACACTCTGTACCATCTAAA	AAGATCCCTGGCCTTGTTGTCCTT	C	A	1	167	0	0	Transversion	http://www.cerealsdb.uk.net/
71	BS00012739	6BL	Heterozygotes	yes	AX-94849575	CCCCTGTTGATATGGAGCCTGACGATGGGAACGCATTGCACAGCGTTAGTCAGGCTGGGGAAGACCCAGTTACATTCTCATCATCTGGTTACAGTGCAACGGAGGCTGAGAAAGAAGTTACCGAGAGTGCCAAGGAGAAGACTGAAGAAAATATAACGCTCCAAAATGTCGACCCTGTCACTGATTCGTCCAATGTTGTTGCTTCCGGTGAGGAGAGCAAGCCTGACGGTTCTGGAGCCCCACGCAATGTGTGGTGGCAGAAGCAACTTATATCGCTCTACAGGAGCGCTAAAGAGAGCAACAAGCTCTGGCCTATCGTTGTGGCTGCTGCCGCTTTGATGGGGATGGCATATTTCCGGCGGCGCTGGCAGAAGGGCAAGCTGCAGCTTCAGCAGGTCA…	GAAACTAGTGTATGCAATGGAGAAATAG	GAAACTAGTGTATGCAATGGAGAAATAC	ACGCCCATACGTTCTGCGGCAT	G	C	21	58	89	0	Transversion	http://www.cerealsdb.uk.net/
72	BS00018086	7AS	Polymorphic	yes	AX-94440438	GTGGCCGTAGGGAAACACTCTGAAGCAATGAGTGACCAGCCGAAGAAGACGGCCAGGAGCCAAGAAGCAACGCAGCAGAAAGCGTCGTCTTCGGAAGAACAGCAGCAGGAAAAGATAAATGAGGTGCGGGGTCTCCTTGGCAGTCTGACGGAGGAGATGCCGAGTTTTATGTCAGACGCCACCATCCGCCGTTTCCTCAGGGCGAGGAATTGGAGCATGGAGCAAGCAACCAAGGGTCTCAAGGAGACTGTCAAGTGGAGGCGTGACTACAGGCCGGATGCAATTTCCTGGGACGACGTTGCAGAAATGGAGAACGAGGTCAGGAGGACACATGTGGCCGACTACCTTGA[C/T]AAGAATGGAAGAAGTGTCCTCGTATCAAACGTACCAATGAAGTC…	ACATGTGGCCGACTACCTTGAC	CACATGTGGCCGACTACCTTGAT	TTTGATACGAGGACACTTCTTCCATTCTT	C	T	126	42	0	0	Transition	http://www.cerealsdb.uk.net/
73	Lr47-2	7AS	Polymorphic	not	-	--	GTGTGCCGAAGTGGACAC	GTGTGCCGAAGTGGACAT	GTACCGCAGCCTGGTAAGTT	G	A	78	90	0	0	Transition	CIMMYT, based on PS10 clone from Helguera et al.(2000) *
74	BS00014199	7AL	Polymorphic	not	-	ACTCAGCTCATATATTATGTTCCTGTCTGCTCCCATGCACGAATATAGTTCTAAGTTGCACGAGGGCACACCACGAAACGCACACTCGATCAAGACTAGCTAATTATAACAAAGAC[G/C]ACTAGCACACCACACTTGTTGAAGCGTCGATCATCCGGAATTTAACTACTCAAAATGTTTAGGGCTAAAATCTCGGCCGCCGGCCGGACCAGAATCACTTGGCGACGGCGAGTTTGCTGCTGCTGCTGCTGCAAGCCAATGCTTATCTGTCCACGGTGACGGAGACGTTGCCGGCTCCGGCGGGGTTGCTGGTGGGCAGCTCGACGCTCTTCTCCTCCTTGGGGGTTCTCTTGTAGTAGCAGCCGTAGAGGATGAGCTGCATTAGGCCGAAGAAAGCG…	TCAACAAGTGTGGTGTGCTAGTG	CAACAAGTGTGGTGTGCTAGTC	GCACACTCGATCAAGACTAGCTAATTATA	C	G	29	139	0	0	Transversion	http://www.cerealsdb.uk.net/
75	BS00018848	7AL	Monomorphic	not	-	CCAGCTTGGTATCTGGATTGTTGACAATTGGCCCCCGATTTGGTGGTGCAATTGATGACGCCGCTCGGTACTTCAAAGATGCATATGATAGGGGTCTTACGCCTTATGAATTTGTTGAGGGCATGAAAAAGAAGGGAATCCGTGTCCCTGGGATTGGTCACAGGATCAAAAGCAGAGACAACAGGGA[C/T]AAGCGAGTGCAGCTTTTACAGAAATATGCTCATGCACACTTCCCTTCAGTCAAGTACATGGAGTACGCTGTTCAGGTTGAGACCTACACCCTGTCAAAGGCCAACAATTTGGTTATGAATGTTGATGGCGCGATCGGTTCTCTTTTCTTGGATCTTCTTTCTGGGAGTGGAATGTTCAGCAAGCAAGAGACTGACGAGATTATAGAG…	ATCAAAAGCAGAGACAACAGGGAC	GATCAAAAGCAGAGACAACAGGGAT	CATATTTCTGTAAAAGCTGCACTCGCTT	C	T	167	0	1	0	Transition	http://www.cerealsdb.uk.net/
76	BS00009510	7BS	Monomorphic	not	AX-94460534	TTGGCTTGATTGCTGTAAATGATGGGATTCTCCTTCGCAACCATATTTCGAGAATGCTTCGGCTCCACTTTAAGAAGAAGCCTTACTATGCCGATCTCCTTGATTTATTCAACGAGGTTGAGTTCAAGACAGCTTCTGGTCAAATGCTGGACCTTATTACAACCCACGAGGGAGAAAAAGATCTAACGAAATATAACATTGGAGTCCACCGCCGAATTGTTCAATTCAAGACAGCCTACTATTCATTTTATCTGCCGGTTGCATGTGCGCTGCTACTCTCCGGCGAGAGTTTGGAGAACTACAGTGCTGTAGAGAACATACTTGTTGAGATGGGAACTTACTTCCAAGTTCAGGATGATTATCTAGACTGTTATGGTGATCCTGAATTTATTGGCAAGA…	TGTAATCTTCAATGTCGGTGCCG	CTTGTAATCTTCAATGTCGGTGCCA	CTGTTATGGTGATCCTGAATTTATTGGCAA	C	T	166	0	2	0	Transition	http://www.cerealsdb.uk.net/
77	BS00017136	7BS	Monomorphic	not	AX-94637341	AACATCTCTGCCCCAAATTAGTAGCAACGCAAATCCCTGGACAACATCGGCTGTACATGGAAATCTAGGGGCTGTATCTTCCTCATCTATCAAACCTTAAGTTTTAATGTTCTTCTACCTGCTACAACAAACACAACAAAAACCATGGTGACCGTAATCCCGAGACCAAATGAGGCCACCTTCCACCAGGTAAAGCAACTCCAGGATTCGCAGACCGCATCTATCCAGTCCTTTTGATCTGTCAATTGTTTGTGTTGCACCACCATGGGATGCTGGCCTTCATATGAGCTTGACCGAACCATTTGATCTGCCAATTGTTTCTGCTGCACCACCATCGGATGCTGGCCTTTAAGCATAAGATGTTCTTGTT[Y]AAAAATCTTCTTAGCATGCTCATAGA…	GCCTTTAAGCATAAGATGTTCTTGTTC	GGCCTTTAAGCATAAGATGTTCTTGTTT	GGAACTCTATGAGCATGCTAAGAAGATTT	C	T	168	0	0	0	Transition	http://www.cerealsdb.uk.net/
78	BS00015653	7BS	Monomorphic	not	AX-94752691	TTTTTGACACCAGGAAGAAGCTCAACAACATCAAGCTCTATGTGCGCCGTGTCTTCATCATGGACAACTGTGAGGAGCTGATCCCAGAGTGGCTGAGCTTTGTCAAGGGCATTGTTGACTCTGAGGATCTTCCCCTGAACATCTCTCGTGAGACACTCCAGCAGAACAAGATCCTCAAGGTCATCCGGAAGAACCTTGTGAAGAAGTGCATCGAGCTCTTCTTTGAGATTGCCGAGAACAAGGAGGACTACAACAAGTTCTATGAGGCTTTCTCCAAGAACCTCAAGCTTGGCGTCCACGAGGACTCCACCAACAGGACCAAGCTTGCTGAGCTCCTGAGGTACCACTCCACCAAGAGCGGTGATGAGCTTACCAGCCTCAAGGACTACGTGAC[G/T]…	GAGCCTCAAGGACTATGTGACG	CGAGCCTCAAGGACTATGTGACT	AGATCTCGTTCTGTCCCTCCTTCAT	G	T	168	0	0	0	Transversion	http://www.cerealsdb.uk.net/
79	BS00012587	7BL	Polymorphic	not	-	AACCAAGGTGACGATTCGCTCCAATAGCCTGAAGTCCCATTGAGAAGGCCATGAAAAAGAAGCTTCCTACAAGAAGCATTTTCCTGCCTAGCTTGTCCATTAGAAGCATAGCTATAATAGAACCTAACAAATTGGCAATCCCCATGCATATATTGGCAAGGCTAGAGGGCACCCCCACACTTCTGAACACAGTTGATGAGAAATAGAACACAGAATTTATGCCCGATAACTGTTGTAAAGCAAAGAGCGTTGTGCCAATAAAAACAACATTGAAGTGACGACCATAAAACAACTCTGAGAACTTCACACTTTCCCCATCATCTCCTCTCTCCGATCGAGAAAGTTCTGCCATAGCAGATTTTACGTGAAGAGGGCCTAGAAGCTTCTCAAACTGCATTT…	GACTCTCAACACAGAACTCCATG	GGACTCTCAACACAGAACTCCATA	GCTGTCCCAGCAGTTTTACAAGCTA	G	A	85	82	1	0	Transition	http://www.cerealsdb.uk.net/
80	BS00004070	7BL-7	Monomorphic	not	AX-94946007	CCCTGGAGGCGGGACTTGGCCCTAGCAGATTTTGTGGCAGCCATGTAGCTTGGGACTGAC[R]GAGAGCTTGCGAGGCTCTCGTCATCCCGCACCGTTGAGGTGGCTATGCTGTGCCGCCTT	GCCATGTAGCTTGGGACTGACA	CCATGTAGCTTGGGACTGACG	GGGATGACGAGAGCCTCGCAA	T	C	168	0	0	0	Transition	http://www.cerealsdb.uk.net/
81	BS00003756	7BL	Heterozygotes	not	AX-94759937	TCCAAATCCGAAGCCATGCCCAGAAGTTTTTCTCAAAGGTGGTGCGTGAACCTGGTGCTAAAATTGAGATCGAGATCCCTCCCCCCAGGCCAAAGAGGAAACCA[G/C]TACATCCATATCCTCGCAAGCGTGCGAACTCCTGCAATGGAGCAAACCTAGCAAATGGGCAATCCAAGCTTGCTCCTATGTCATCTTCTTCTGGTTCTGACCAAGAGAATGGTTCTCCTGTGTCGGTGCTATCTGCGATGCAGTCGGATGCTTTTGGATCATCGATGTCAAACCCGTCATCTCGCAGTACCTCCCCAGAGTCGTCAGATGAGGAGAACAGTGTTCTTCCAATGGTGAACGGAGGGGAAGGTCAACAAACAGGGATAGATCAACCCCACAAGGAAGCTGAT…	CCAGGCCAAAGAGGAAACCAG	CCAGGCCAAAGAGGAAACCAC	CACGCTTGCGAGGATATGGATGTA	G	C	39	2	127	0	Transversion	http://www.cerealsdb.uk.net/
82	BS00014897	2DS	Polymorphic	yes	AX-94664467	GGATCCTCCTCACCTCATCATCTCATCTTGGCCGCCGCCGAGCAACCAACTCTGCTCCGCTCCGCTCCGCTCCATCGTCGCCTTCGGCCTTCCATTCGCTCCTTCTTCACCAGGTCAGGTCAGGAAGAAAAAGAAGAGGATCGTCCAGTAAGCCTGCCGGGTGGGAGATATCAGCAACATGGATTTTAAGCTCCAGGATATCGAAGCCATCACAAACAACTTTGCAGAGGATCAGATAGTTGGCAGCGGTGGATACGGAGTTGTTTACAGGGCGACCCATGAAGGGGAAGAAATTGCGGTGAAGAAGCTTCGTCAACTGCAGGGACTCGATGATAAGCAATTCGACAACGAGTTCCGTAACCTTCGTAACATACGCCACAAAAATGTTGTGCGGCTAAT…	GCATATATTCGAAGCAGAGCACT	GCATATATTCGAAGCAGAGCACG	GGGGAGCTTATCTTCGCTAAAGAGAT	A	C	2	166	0	0	Transversion	http://www.cerealsdb.uk.net/
83	BS00010442	2DL	Failed	not	-	TCGACTGGGGAACGTCCAGGTCACCGAGCACTACAAGTGAAGCATGGCGGTGCCAAGCACAAAGGAGTCTTTCAAGGCTCGAGTATCAGGCTAGGCAATCTATCAGTGGAGCGTCATCATTTAAGAACCTTCTTGCAAGGTTGCCTCCACGAGTTCATTCAGTCTACTATCGTGATGAGATTGGTAACATCTCCTCATCCCATCTGCGCAGTGATTCATACAAGTCAGAACTAGAAATTGAACCAAGATATCCACTGTTTGGTGGGTGGCACTGCACTTTCACCATCGGCTATGGCATGCCACTGCAAGATTTCCTGTTTGAATCGGCTGATGG[C/T]CGACGCTTCGCCAACCTTACATTTGGATGCCCTCTACTGAATACTGTGGTTGATAATCTT…	CCTGTTTGAATCGGCTGATGGC	TCCTGTTTGAATCGGCTGATGGT	GGCATCCAAATGTAAGGTTGGCGAA	C	T	0	0	0	168	Transition	http://www.cerealsdb.uk.net/
84	BS00016166	3DS	Monomorphic	yes	AX-95019077	AGGTTTTGAGCTTTTGTCTGTTTCCCTGGGATGGATGCCAAGAAGTTCCTGCAGATGGTCGAAGACAAGAAGAAGAGACTCCTTGAGAAGAAGGAAGCCCCACTGAAATGGCAGCAGAAACTGGAAGCGGCAATTAAGGCCACTGAAGAGAAGGAGAAGAAGCTCAAGTCAAAAAAGCACAGGAGGCGAAGCTATTCTTCCTCAGAGTCTGACAGTGAATCCGAGAGCGACAGTGATCGGAAACACAGGAAGAGGAAGGACCGCAAAAGGCACAGGAAACATGGCCACTCTGACTCTGATGGTGCCAGGAGGCGCAAGCACAGGTCAAAGAGGAGGAGCTTGGACTCTAGTGATGAGAGCGACAGTGATGAATATGATAGCGAATCTGAAGAAGAGCGC…	AGCCAGACAAGATGAATGATGGC	GAGCCAGACAAGATGAATGATGGT	GCCGGCTTTTGTGAGACCCCTT	C	T	168	0	0	0	Transition	http://www.cerealsdb.uk.net/
85	BS00003580	5DL-1	Monomorphic	yes	AX-94592260	CCCTCTCCACCCTCCTTCCCCATCCCCGTCGTCGCTCTTCGATGCCCGCCGGCGATTCCGTAGACGAGCGGCGAGAGGCGAGTAGCAGAGCGAGCGGGGAAGCTAGGGTTTCGGCGTGTGTGTGCGGGAGGGGAGAAGAGGAGCGGGGATGGCGCAGGCGGTGGAGGAGTGGTACCGGCAGATGCCCATCATCACGCGCTCCTACCTCACCGCCGCCGTCCTCACCACCGTCGGCTGCACCCTCGAGATCATCTCGCCCTACCACCTCTACCTCAACCCCAAGCTGGTGGTGCAGCACTACGAGATCTGGCGCCTCGTCACCAACTTCCTCTACTTCCGCAAGATGGATTTGGATTTTCTGTTCCACATGTTTTTTCTTGCGCGCTACTGCAAACTTCT…	AGTATAATTCTCAGTTAGGGGTTGGT	GTATAATTCTCAGTTAGGGGTTGGG	AATTCGGTTAGCAGCGCATTGGCAT	T	G	0	168	0	0	Transversion	http://www.cerealsdb.uk.net/
	* Helguera M, Khan IA, Dubcovsky J. Development of PCR markers for the wheat leaf rust resistance gene Lr47. Theor. Appl. Genet. 2000; 100:1137–1143. https://doi.org/10.1007/s001220051397
